# Supplementary material for: Phosphorylated Curdlan Gel/Polyvinyl Alcohol Electrospun Nanofibres Loaded with Clove Oil with Antibacterial Activity
Source: MDPI journal article supplement (doi:10.3390/gels8070439), 2022-07-13
Supplement: s1 [file s1]

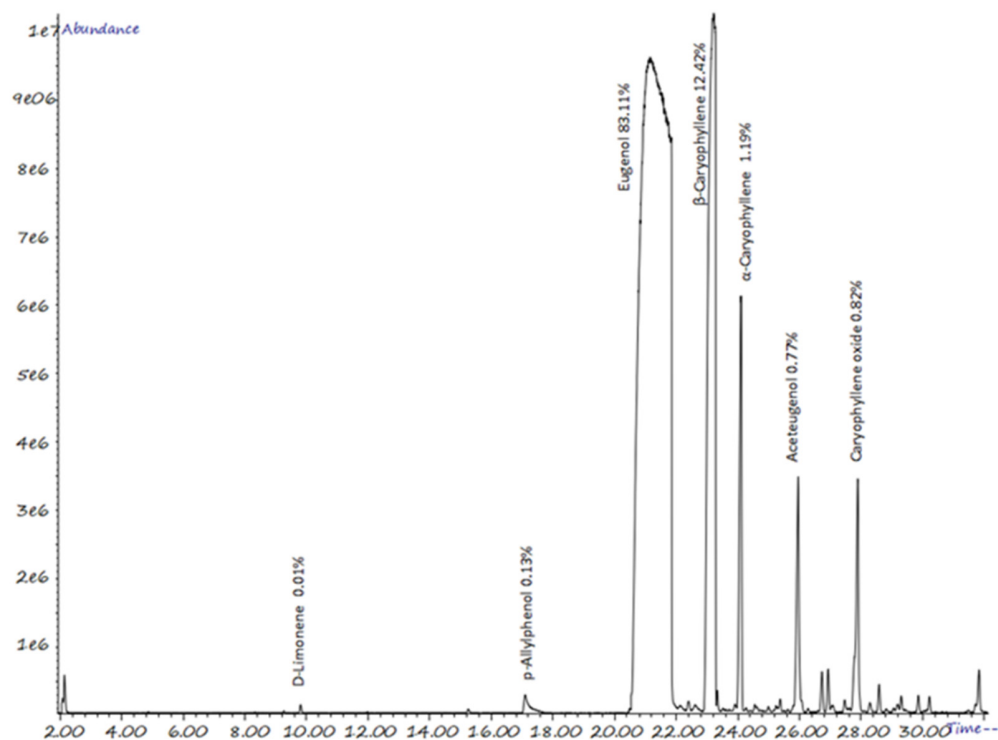

**Figure S1.** GC-MSD/FID gas-chromatography diagram of clove essential oil

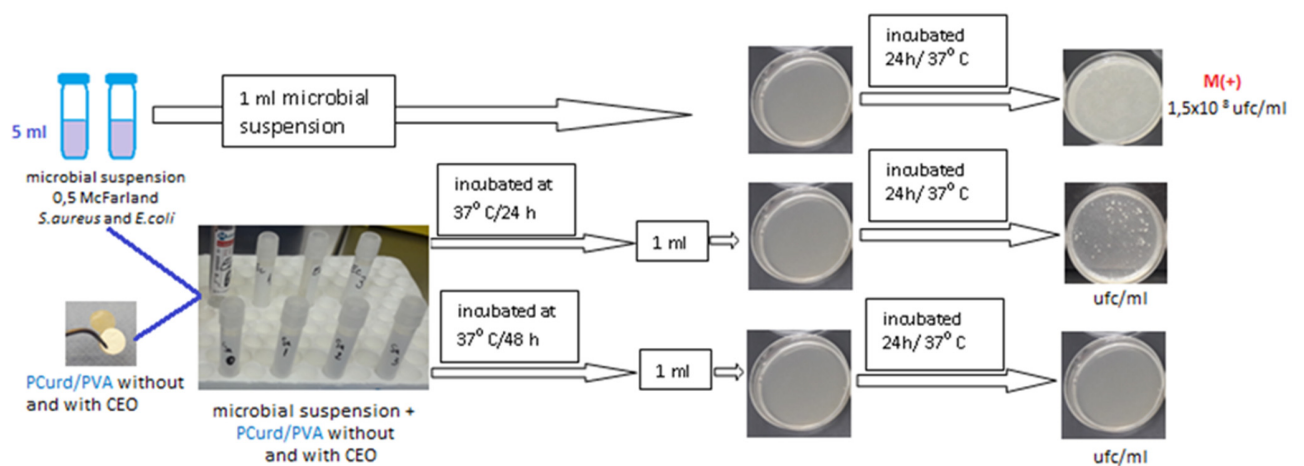

**Figure S2.** Diagram of work steps: Time kill assay



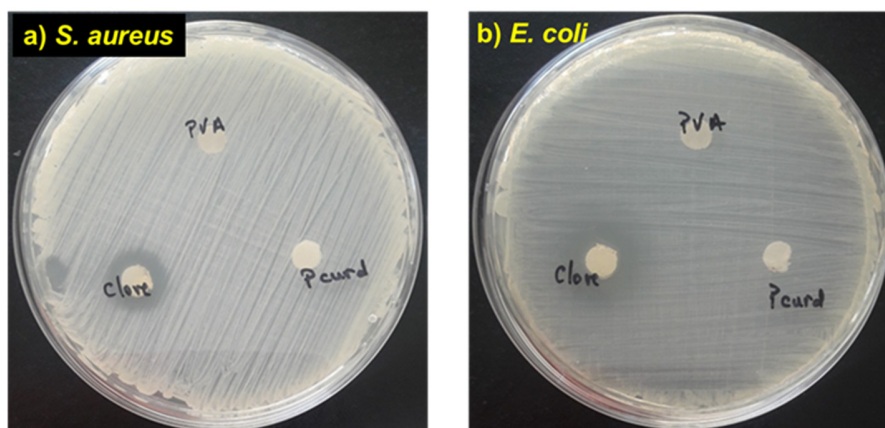

**Figure S3.** Antibacterial assay test of PCurd, PVA and CEO against *S. aureus* (a) and *E. coli* (b)

**Table S1.** Test results of antimicrobial activity of PVA, PCurd and Clove essential oil

| Sample cod | <i>S. aureus</i><br>ATCC 25923<br>[mm] | <i>E. coli</i><br>ATCC 25922<br>[mm] |
|------------|----------------------------------------|--------------------------------------|
| PVA        | -                                      | -                                    |
| PCurd)     | -                                      | -                                    |
| CEO        | 14                                     | 9,94                                 |
